# Supplementary material for: Organic aerosols and inorganic species from post-harvest agricultural-waste burning emissions over northern India: impact on mass absorption efficiency of elemental carbon
Source: Royal Society of Chemistry journal article supplement (doi:10.1039/c4em00307a), 2014-07-22
Supplement: c4em00307a1.pdf [file c4em00307a1.pdf]

## Supplementary Information

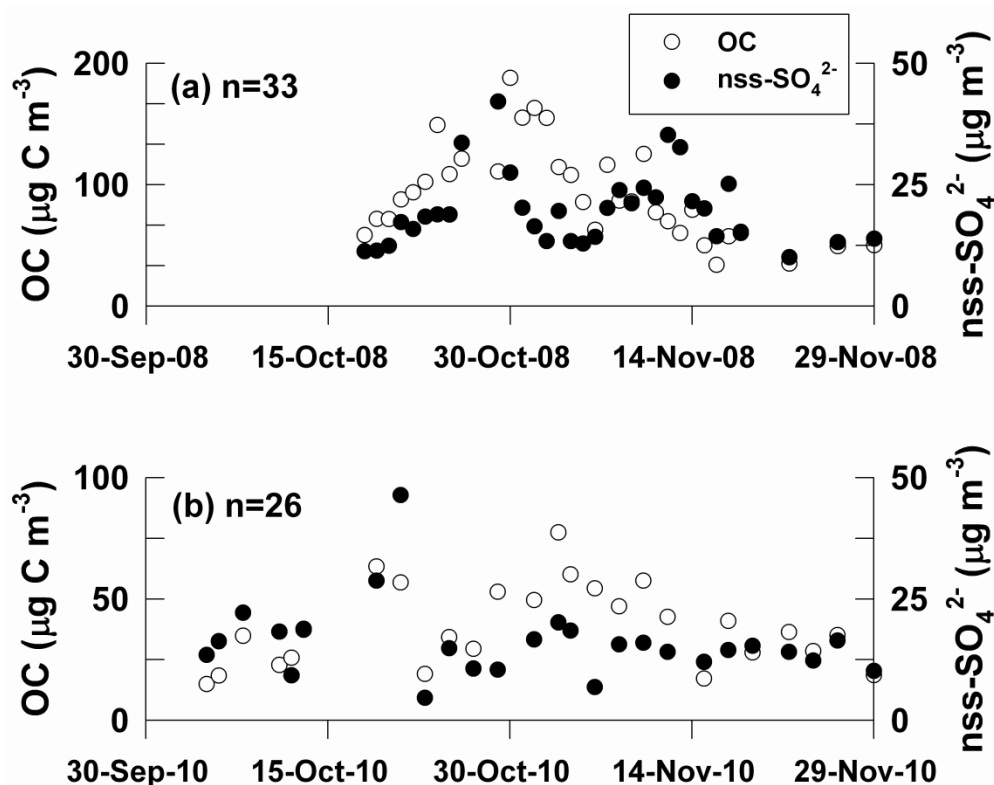

3

4 **Fig. S1** The co-variability of OC and nss-SO<sub>4</sub><sup>2-</sup> during paddy-residue burning emissions  
5 (October–November) in the Indo-Gangetic Plain (IGP) in: (a) 2008 and (b) 2010.

6

7 The farmers utilize Bentonite sulphur (pure elemental S  $\approx$  90%; a fertilizer) for high paddy-  
8 crop yield in the IGP. The OC is a major component from paddy-residue burning emission and  
9 its co-variability with nss-SO<sub>4</sub><sup>2-</sup> (Supplementary Fig. S1) suggests the origin of SO<sub>4</sub><sup>2-</sup> in ambient  
10 aerosols via rapid oxidation of sulphur dioxide gas (SO<sub>2</sub>) involving heterogeneous reactions of  
11 aerosols as suggested by Lammel and Leip (2005)<sup>1</sup> following its emission from the paddy-  
12 residue (containing pure elemental S) burning. The ambient atmospheric conditions and chemical  
13 reactivity leading to the formation of SO<sub>4</sub><sup>2-</sup> are in sharp contrast to the chamber-based  
14 experiments. It is, thus, relevant to study particulate concentrations of SO<sub>4</sub><sup>2-</sup> in ambient aerosols  
15 and their impact on atmospheric chemistry and human health. This is a first comprehensive  
16 study, conducted from a site located in the Indo-Gangetic Plain, to assess the temporal variability

17 and impact of agricultural-waste burning emissions on the concentrations of  $\text{SO}_4^{2-}$  under ambient  
18 atmospheric conditions.

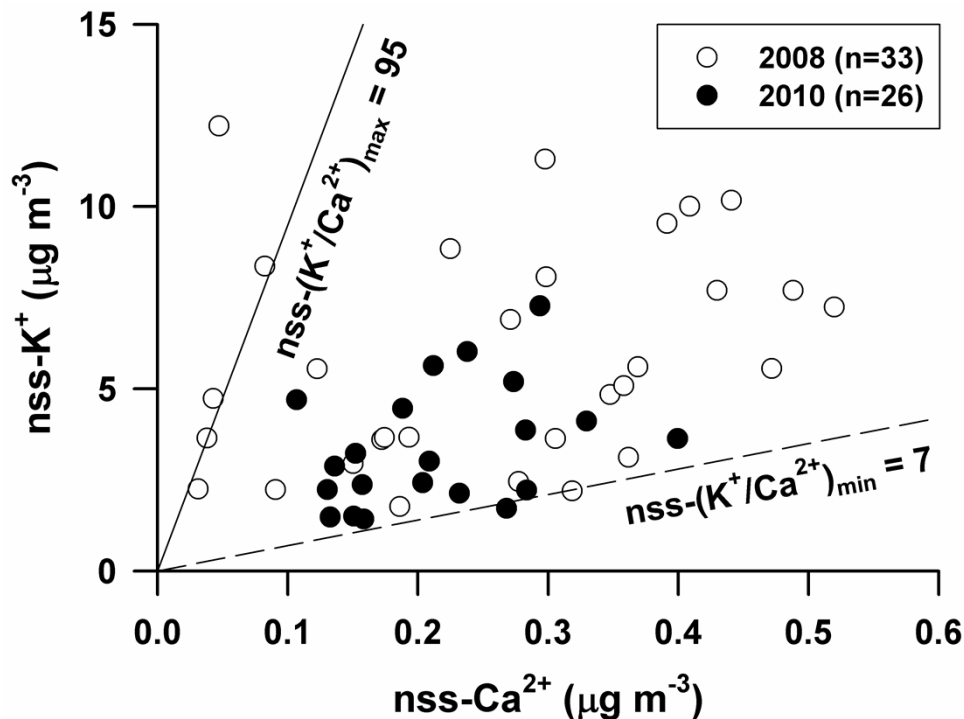

19

20 **Fig. S2** Scatter plot between the nss-K<sup>+</sup> and nss-Ca<sup>2+</sup> infers about the K<sup>+</sup> derived from paddy-  
 21 residue burning emissions (K<sup>+</sup><sub>BB</sub>) in the IGP.

22

23 The minimum nss-(K<sup>+</sup>/Ca<sup>2+</sup>) mass ratio of 7 (lower envelop) corresponds to crustal  
 24 composition. However, the upper envelop (nss-K<sup>+</sup>/nss-Ca<sup>2+</sup> mass ratio of 95) corresponds to  
 25 mixed contribution from the paddy-residue burning emissions and mineral dust. Thus, it can be  
 26 inferred that the nss-(K<sup>+</sup>/Ca<sup>2+</sup>) mass ratio of 88 (= 95 – 7) is associated with the paddy-residue  
 27 burning emissions in the IGP. It is important to state here that in an earlier study, the nss-  
 28 (K<sup>+</sup>/Ca<sup>2+</sup>) maximum mass ratio of 10 was attributed for biomass burning emissions, owing to a  
 29 negligible nss-(K<sup>+</sup>/Ca<sup>2+</sup>) minimum ratio of 0.12 (10 – 0.12 ≈ 10, two orders of magnitude  
 30 difference).<sup>2</sup> In this study, the difference between maximum and minimum nss-(K<sup>+</sup>/Ca<sup>2+</sup>) mass  
 31 ratio has been considered to represent the paddy-residue burning emissions.

32

33 The following equations have been used to determine the K<sup>+</sup><sub>BB</sub>:

$$34 \quad K_{BB}^+ = (nss - K^+) - (K_{Dust}^+) \quad (1)$$

$$35 \quad nss - K^+ = K_{aerosol}^+ - 0.037 * Na_{aerosol}^+ \quad (2)$$

$$36 \quad K_{Dust}^+ = 7 * [(nss - Ca^{2+}) - Ca_{BB}^{2+}] \quad (3a)$$

$$37 \quad Ca_{BB}^{2+} = \frac{nss - K^+}{88}$$

38 (3b)

$$39 \quad nss - Ca^{2+} = Ca_{aerosol}^{2+} - 0.038 * Na_{aerosol}^+ \quad (4)$$

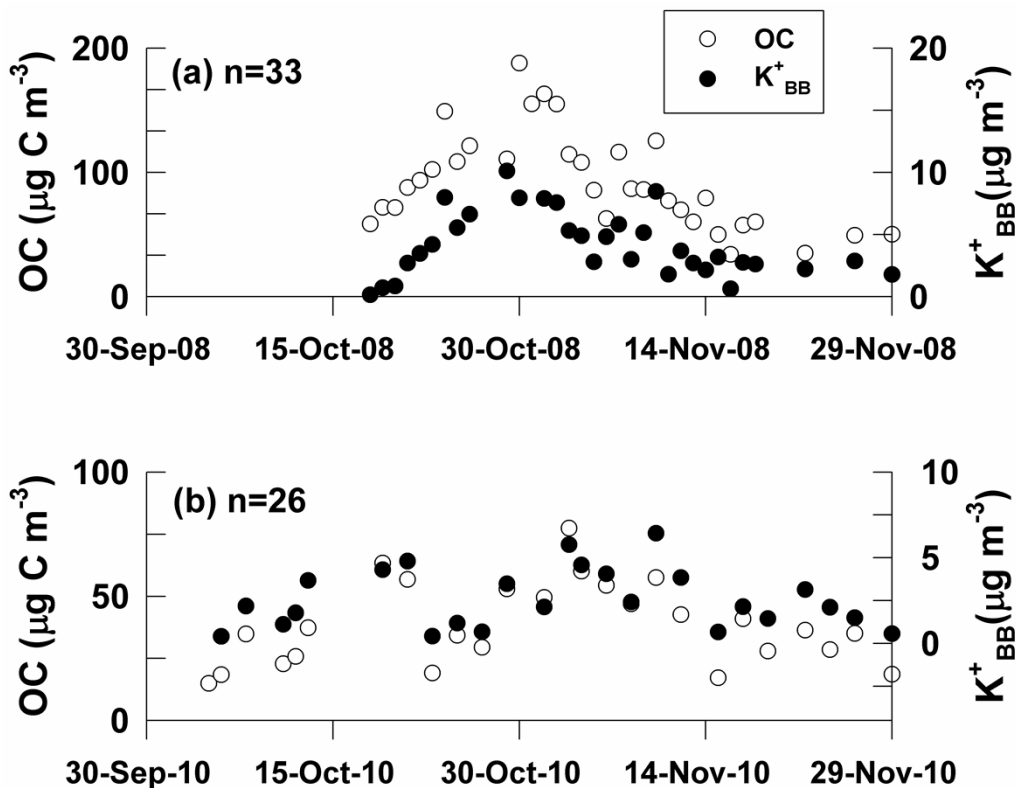

40

41 **Fig. S3** The co-variability of OC and  $K^+_{BB}$  during paddy-residue burning emissions (October–  
 42 November) in the Indo-Gangetic Plain (IGP) in: (a) 2008 and (b) 2010. BB refers to biomass  
 43 burning emissions.

44

45 Recently, it has been emphasized to assess the temporal co-variability of  $K^+$  and OC to utilize  
 46 the  $K^+/OC$  as a tracer of biomass burning emissions in atmospheric aerosols.<sup>3,4</sup> In this study, the  
 47 OC and  $K^+_{BB}$  concentrations exhibit a temporal co-variability (Supplementary Fig. S3),  
 48 suggesting the use of  $K^+_{BB}/OC$  ratio as a tracer of paddy-residue burning emission.

## 49 References

- 50 1 G. Lammel and A. Leip, *Environmental Science and Pollution Research*, 2005, **12**, 213-  
51 220.
- 52 2 C. A. Pio, M. Legrand, C. A. Alves, T. Oliveira, J. Afonso, A. Caseiro, H. Puxbaum, A.  
53 Sanchez-Ochoa and A. Gelenc ser, *Atmos. Environ.*, 2008, **42**, 7530-7543.
- 54 3 Y. Cheng, G. Engling, K. B. He, F. K. Duan, Y. L. Ma, Z. Y. Du, J. M. Liu, M. Zheng  
55 and R. J. Weber, *Atmos. Chem. Phys.*, 2013, **13**, 7765-7781.
- 56 4 X. Zhang, A. Hecobian, M. Zheng, N. H. Frank and R. J. Weber, *Atmos. Chem. Phys.*,  
57 2010, **10**, 6839-6853.
